# Supplementary material for: Investigation of optical, dielectric, and conduction mechanism in lead-free perovskite CsMnBr3
Source: Royal Society of Chemistry journal article supplement (doi:10.1039/d4ra01151a), 2024-01-01
Supplement: d4ra01151a1.pdf [file d4ra01151a1.pdf]

**Investigation of optical, dielectric, and conduction mechanism  
in lead-free perovskite CsMnBr<sub>3</sub>.**

**Moufida Krimi<sup>1</sup>, Fadhel Hajlaoui<sup>2</sup>, Mohammed S. M. Abdelbaky<sup>3,4</sup>, Santiago Garcia-Granda<sup>4</sup> and Abdallah Ben Rhaïem<sup>1\*</sup>**

<sup>1</sup>Laboratory LaSCOM, Faculty of sciences of Sfax, University of Sfax, BP1171, 3000, Sfax, Tunisia.

<sup>2</sup>Laboratoire Physico-chimie de l'Etat Solide, D'épartement de Chimie, Faculté des Sciences de Sfax, Université de Sfax, B.P. 1171, 3000 Sfax, Tunisia

<sup>3</sup>Department of Physical Chemistry, Faculty of Chemical Sciences, University of Salamanca, E-37008 Salamanca, Spain

<sup>4</sup>Department of Physical and Analytical Chemistry, Faculty of Chemistry, University of Oviedo-CINN(CSIC), 33006 Oviedo, Spain.

\*Author for correspondence ([abdallahrhaïem@yahoo.fr](mailto:abdallahrhaïem@yahoo.fr))

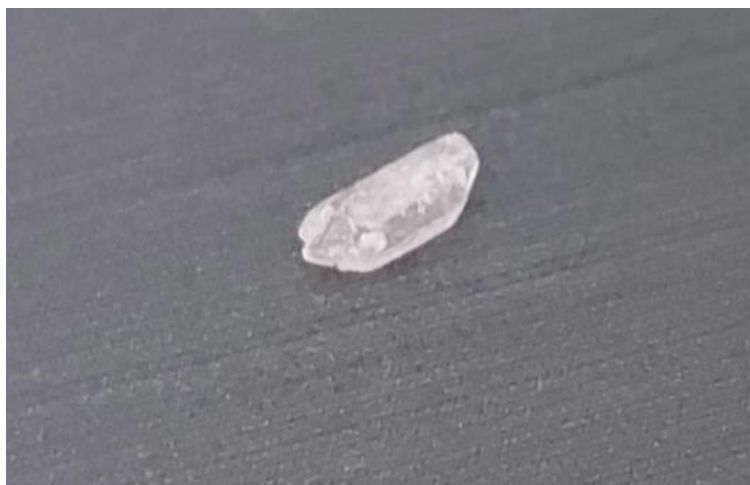

Figure S1: Image of the obtained crystals for CsMnBr<sub>3</sub> compound.

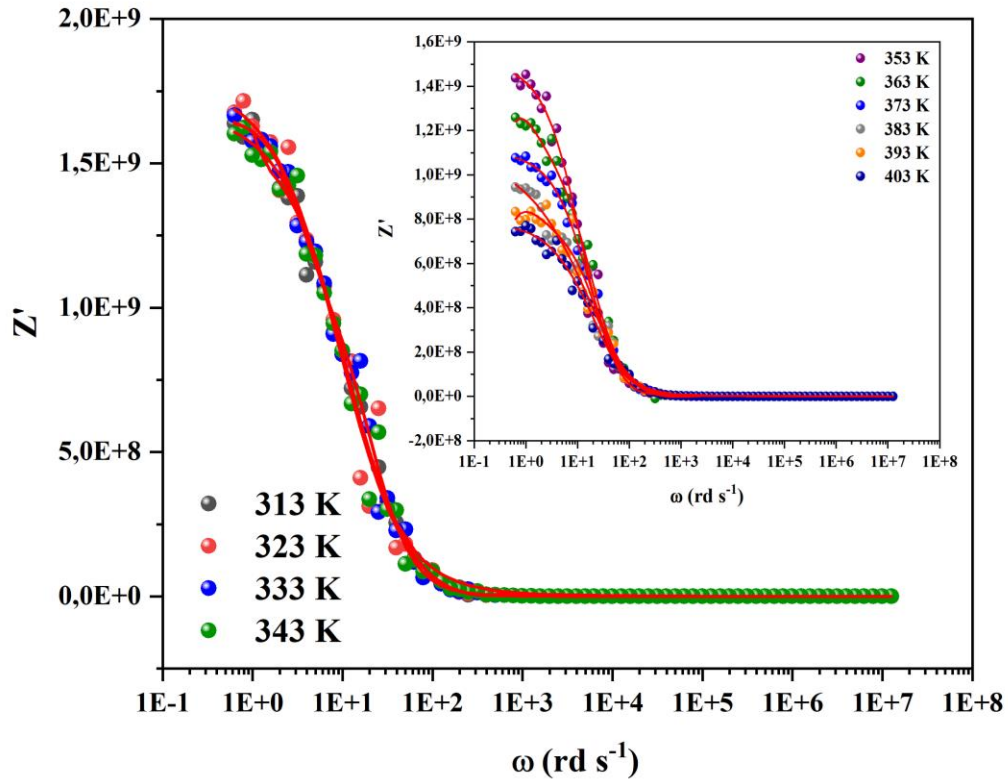

Figure (S2): Frequency dependence of real part of the impedance of  $\text{CsMnBr}_3$  compound.

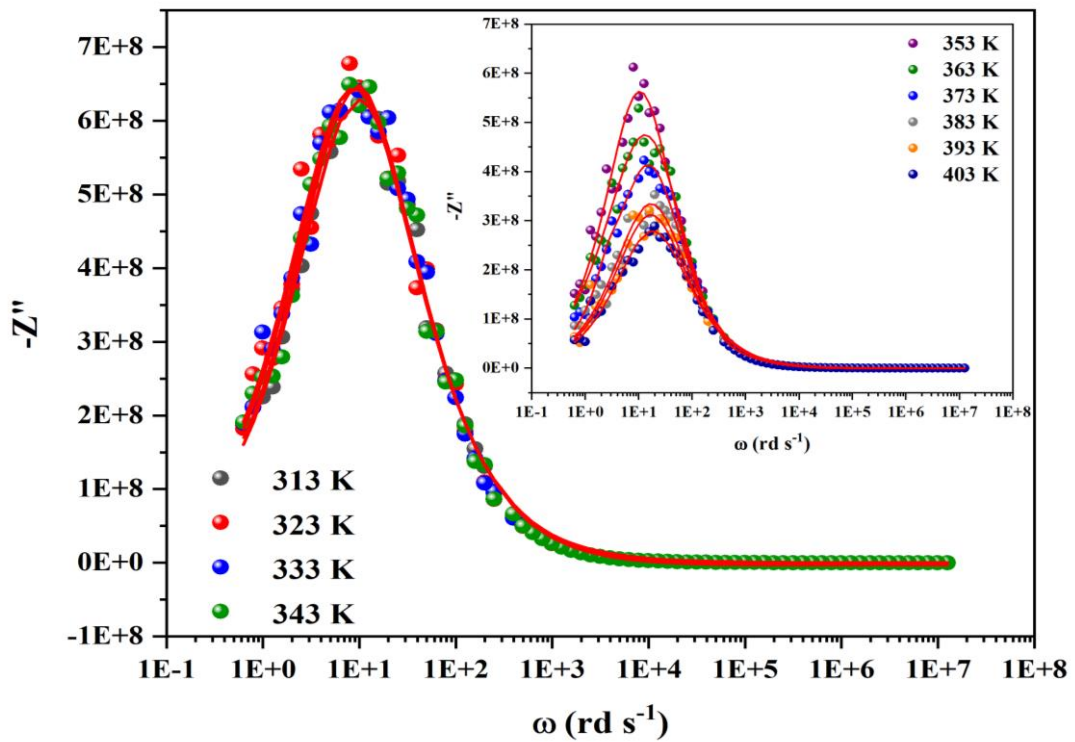

Figure (S3): Frequency dependence of imaginary part of electrical impedance of CsMnBr<sub>3</sub> compound.

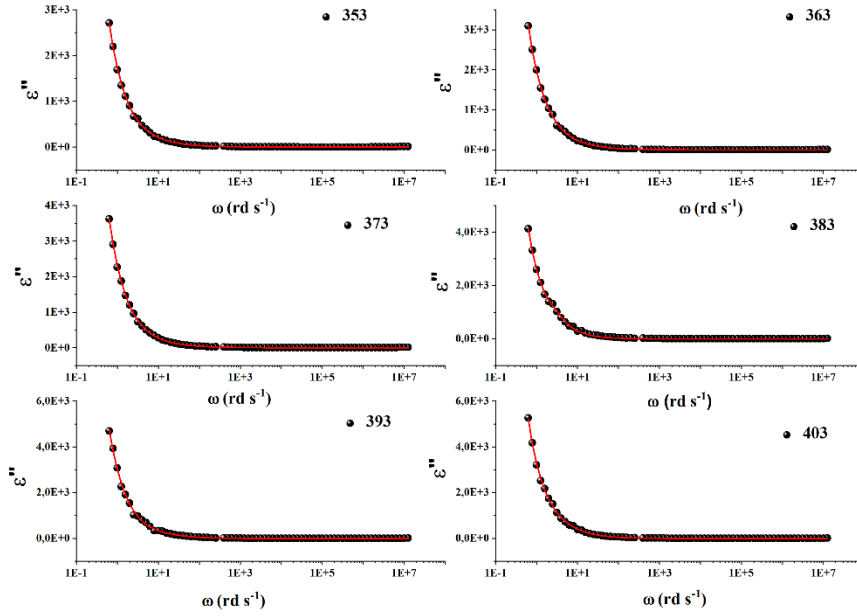

Figure (S4): Frequency-dependent imaginary part of dielectric permittivity at different temperatures.

| Temperature (K) | $\tau$                 | $\alpha$ | M     | $\sigma_{fc}$          |
|-----------------|------------------------|----------|-------|------------------------|
| 353             | $1.493 \times 10^{-8}$ | 0.325    | 0.425 | $1.32 \times 10^{-5}$  |
| 363             | $1.324 \times 10^{-8}$ | 0.453    | 0.481 | $3.635 \times 10^{-5}$ |
| 373             | $1.192 \times 10^{-4}$ | 0.562    | 0.524 | $4.325 \times 10^{-5}$ |
| 383             | $9.254 \times 10^{-5}$ | 0.584    | 0.632 | $5.012 \times 10^{-5}$ |
| 393             | $7.326 \times 10^{-8}$ | 0.643    | 0.752 | $5.832 \times 10^{-5}$ |
| 403             | $5.236 \times 10^{-5}$ | 0.724    | 0.784 | $6.325 \times 10^{-5}$ |

Table S1: The parameters  $\tau$ ,  $\alpha$ , m and  $\sigma_{fc}$  evaluated from the fitting of the dielectric loss with the modified Cole - Cole model.

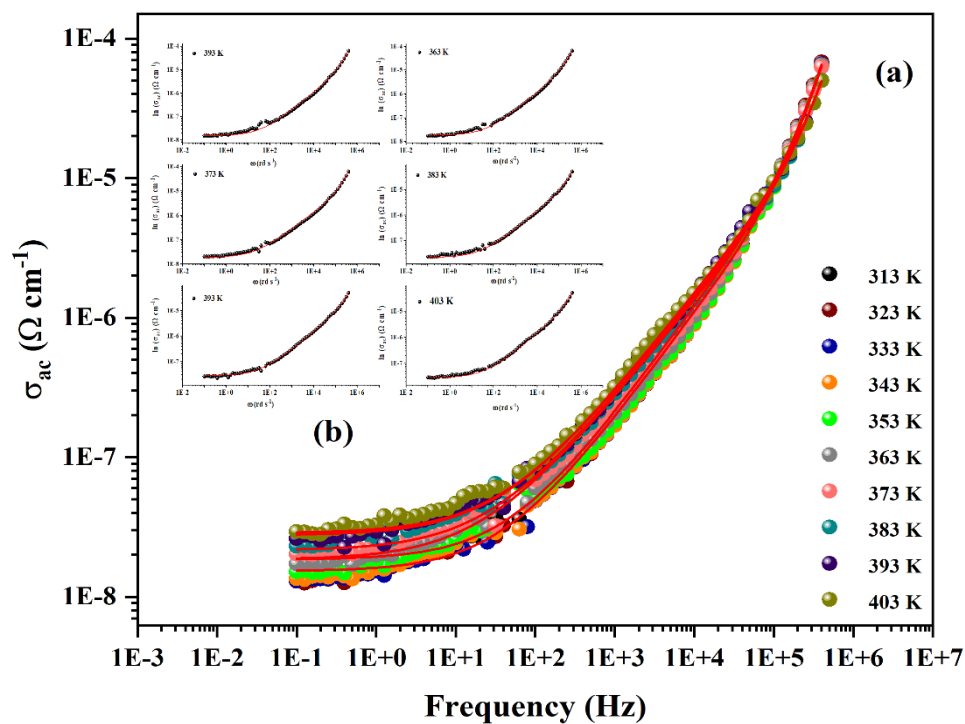

Figure (S5): Fitted curves of AC conductivity of CsMnBr<sub>3</sub> compound.

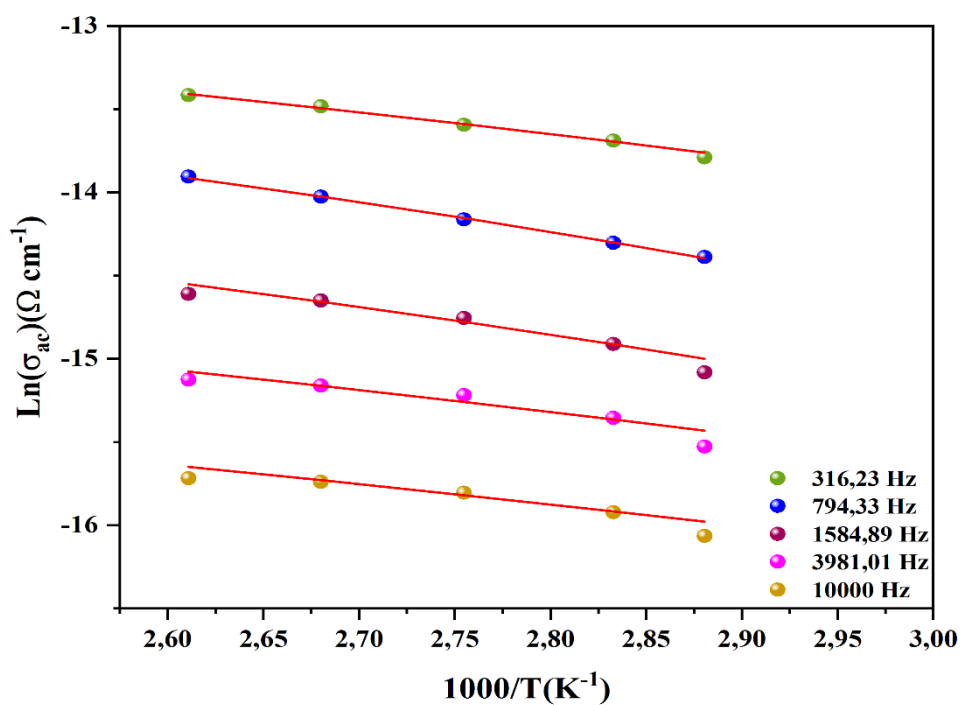

Figure (S6): Temperature dependence of AC conductivity for the CBH model.

| <b>Frequency (Hz)</b> | <b><math>N_T 10^{22} \text{cm}^{-3}</math></b> | <b><math>w_H(\text{eV})</math></b> |
|-----------------------|------------------------------------------------|------------------------------------|
| <b>316.23</b>         | <b>2.24</b>                                    | <b>0.60</b>                        |
| <b>794.33</b>         | <b>2.04</b>                                    | <b>0.706</b>                       |
| <b>1584.89</b>        | <b>1.867</b>                                   | <b>0.78</b>                        |
| <b>3981.01</b>        | <b>1.77</b>                                    | <b>0.74</b>                        |
| <b>10000</b>          | <b>1.567</b>                                   | <b>0.72</b>                        |

Table (S2): parameter resulting from NSPT fit.
