# Supplementary material for: Investigation of optical, dielectric, and conduction mechanism in lead-free perovskite CsMnBr3
Source: Royal Society of Chemistry journal article supplement (doi:10.1039/d4ra01151a), 2024-01-01
Supplement: d4ra01151a3.pdf [file d4ra01151a3.pdf]

## Tables

|                               |                                               |
|-------------------------------|-----------------------------------------------|
| <b>Crystal system</b>         | <b>Hexagonal</b>                              |
| <b>Space group</b>            | <b>P 63/mmc</b>                               |
| <b>Formula units</b>          | <b><math>a = b = 7.618</math> (4)</b>         |
| <b>(A°)</b>                   | <b><math>c = 6.519</math> (2)</b>             |
|                               | <b><math>\alpha = \beta = 90^\circ</math></b> |
|                               | <b><math>\gamma = 120^\circ</math></b>        |
| <b>Volume (A<sup>3</sup>)</b> | <b>327.637(6)</b>                             |
| <b>Rp (%)</b>                 | <b>35.5</b>                                   |
| <b>Rwp (%)</b>                | <b>44.5</b>                                   |
| <b>Rexp (%)</b>               | <b>29.6</b>                                   |
| <b><math>\chi^2</math></b>    | <b>2.23</b>                                   |
| <b>RB (%)</b>                 | <b>5.09</b>                                   |
| <b>RF (%)</b>                 | <b>9.06</b>                                   |

Table 1: Unit cell parameters and fit criteria of CsMnBr<sub>3</sub>pure polycrystalline material.
